# Supplementary material
Source: publisher figshare collection journal article supplement (https://sage.figshare.com/ndownloader/files/20080112)
Supplement: Supplementary file 1 [file 20080112]

**Supplementary Table 1.** Review of the cognitive data from Asian populations of PLWH

| Region (years)                                         | Data set & definition of cognitive impairment                                                                                                                                                   | Main findings                                                                                                                                                                                                                                                                            |
|--------------------------------------------------------|-------------------------------------------------------------------------------------------------------------------------------------------------------------------------------------------------|------------------------------------------------------------------------------------------------------------------------------------------------------------------------------------------------------------------------------------------------------------------------------------------|
| <b>Southern India (2010-2013)</b><br>[1]               | 69 PLWH and 67 HIV-<br>Age: 37.4 years in PLWH; time since diagnosis: 5 years;<br>Current CD4: 532 cells/uL; %<br>Definition: Global deficit score $\geq 0.5$                                   | - prevalence of HAND: 33% in PLWH vs.13% in HIV-; $p < 0.01$ ).<br>- Impaired function in the motor and speed of information processing domains.                                                                                                                                         |
| <b>Guangxi, China (2011)</b> [2]                       | 230 PLWH and 99 HIV-<br>Age: 18 to 65 years; Current CD4: 60.3-71 cells/uL; time since diagnosis: 19.7 months<br>Definition: Frascati criteria                                                  | - prevalence of HAND in PLWH: 37.39% (18.27% ANI, 18.87% MND, and 8.26% HAD)                                                                                                                                                                                                             |
| <b>Anhui and Yunnan, China(unremarked periods)</b> [3] | 308 PLWH<br>Age: 36 years; Current CD4: 392 cells/uL; % detectable viral load: 76%; % not on cART: 63%; Hepatitis C: 91%;<br>Definition: Global deficit score $\geq 0.5$                        | - prevalence of HAND: 26.6%.<br>- cognitive impairment was associated with AIDS ( $p < 0.01$ ) but not with HIV genotype; worsened neurocognitive function were associated with lower CD4+ count, lower CD4+ nadir, and higher viral diversity .                                         |
| <b>Thailand (2011-2014)</b><br>[4]                     | 329 PLWH and 510 HIV-<br>Age: 45.7 years; Current CD4 563 cells/uL; %; HIV RNA <40 copies/mL 92.77%; cART duration: 12.1 years;<br>Definition: not by Frascati but by psychomotor tests SD      | - 43% of PLWH : psychomotor impairment<br>-age and lower income were independently associated with cognitive impairment.                                                                                                                                                                 |
| <b>Japan (2014-2016)</b><br>[5]                        | 728 PLWH<br>Age: 45.6 years; Current CD4: 549.7 cells/uL; % Viral load <20 copies/mL: 86.5%; time since diagnosis: 91.4 months;<br>cART duration: 81.7 months;<br>Definition: Frascati criteria | - prevalence of HAND: 25.3% (13.5% ANI, 10.6% MND, 1.2% HAD)<br>- risk factors: age ( $\geq 50$ years) and incomplete virological suppression<br>- current ART (protective factor)<br>- executive and visuospatial functions showed better diagnostic accuracy for HAND than other tests |

|                                            |                                                                                                                                                                       |                                                                                                                                          |
|--------------------------------------------|-----------------------------------------------------------------------------------------------------------------------------------------------------------------------|------------------------------------------------------------------------------------------------------------------------------------------|
| <b>Indonesia<br/>(2017) <sup>[6]</sup></b> | 85 PLWH<br><br>Age: 38.53 years; Current CD4:<br>432.58 cells/uL; duration of<br>cART: 37.5 months<br><br>Definition: Montreal Cognitive<br>Assessment (MoCA-INA) <26 | - prevalence of cognitive impairment: 75.3%<br>-MoCA-INA score had significant correlation with<br>CD4 counts ( $r=0.271$ , $p=0.012$ ), |
|--------------------------------------------|-----------------------------------------------------------------------------------------------------------------------------------------------------------------------|------------------------------------------------------------------------------------------------------------------------------------------|

---

HAND: HIV associated neurocognitive disorder; MoCA-INA: Montreal Cognitive Assessment-  
Indonesian Version

**Supplementary Table 2:** Neuropsychological tests administered to study participants in the COBRA and NeuroAIDS studies

| <b>Domain</b>             | <b>COBRA</b>                      | <b>NeuroAIDS</b>           |
|---------------------------|-----------------------------------|----------------------------|
| <b>Attention</b>          | PASAT 3                           | K-WAIS Digit Span          |
|                           | WAIS-III Letter-number sequencing |                            |
| <b>Executive function</b> | Trail Making Test-B               | Trail Making Test-B        |
|                           | Wisconsin CST                     | Wisconsin CST              |
|                           |                                   | K-WAIS Similarity          |
| <b>Language</b>           | Category Fluency                  | K-WAIS Vocabulary          |
|                           | Letter Fluency                    |                            |
| <b>Memory</b>             | Rey Auditory Verbal Learning      | K-Auditory Verbal Learning |
|                           | WMS-IV Visual Reproduction        | K-Complex Figure Tests     |
| <b>Motor function</b>     | Grooved pegboard                  | Grooved pegboard           |
|                           | Finger tapping                    |                            |
| <b>Processing speed</b>   | Trail Making Test-A               | Trail Making Test-A*       |
|                           | WAIS-III Digit Symbol             | K-WAIS Digit Symbol        |
|                           | WAIS-III Symbol Search            |                            |
|                           | Stroop colour-word test           |                            |

**Supplementary Table 3:** AUROC (95% CI) of individual neuropsychological tests to discriminate between individuals with and without cognitive impairment in COBRA and NeuroAIDS PLWH.

| Domain                    | Neuropsychological test           | Scoring system                          | AUROC (95% CI)       |                      |
|---------------------------|-----------------------------------|-----------------------------------------|----------------------|----------------------|
|                           |                                   |                                         | COBRA (n=134)        | NeuroAIDS (n=194)    |
| <b>Attention</b>          | PASAT 3                           | Total correct summations                | 0.844 (0.785, 0.903) | N/A                  |
|                           | WAIS-III Letter-number sequencing | Total correct sequences                 | 0.812 (0.751, 0.872) | N/A                  |
|                           | K-WAIS Digit Span                 |                                         | N/A                  | 0.734 (0.647, 0.821) |
| <b>Executive function</b> | Trail Making Test-B               | Total time to complete                  | 0.876 (0.820, 0.933) | 0.711 (0.624, 0.798) |
|                           | Wisconsin CST                     | Number of total errors                  | 0.806 (0.714, 0.898) | 0.742 (0.654, 0.829) |
|                           | Wisconsin CST                     | Number of perseverative errors          | 0.798 (0.710, 0.887) | 0.696 (0.606, 0.786) |
|                           | Wisconsin CST                     | Number of perseverative responses       | 0.809 (0.726, 0.892) | N/A                  |
|                           | Wisconsin CST                     | Number of conceptual level responses    | N/A                  | 0.734 (0.647, 0.821) |
|                           | K-WAIS Similarity                 |                                         | N/A                  | 0.700 (0.611, 0.790) |
| <b>Language</b>           | Category Fluency                  | Total number of animals in 1 minute     | 0.823 (0.739, 0.908) | N/A                  |
|                           |                                   | Total number of occupations in 1 minute | 0.807 (0.711, 0.904) | N/A                  |
|                           | Letter Fluency                    | Total number of words (1 min/3 letters) | 0.675 (0.566, 0.783) | N/A                  |
|                           | K-WAIS Vocabulary                 |                                         | N/A                  | 0.775 (0.706, 0.843) |
| <b>Memory</b>             | Rey Auditory Verbal Learning      | Total recalled words trials 1-5         | 0.723 (0.627, 0.819) | 0.725 (0.654, 0.797) |
|                           | Rey Auditory Verbal Learning      | Total words recalled                    | 0.740 (0.641, 0.838) | 0.732 (0.660, 0.803) |
|                           | WMS-IV Visual Reproduction        | Immediate recall                        | 0.729 (0.628, 0.830) | N/A                  |
|                           | WMS-IV Visual Reproduction        | Delayed recall                          | 0.764 (0.685, 0.843) | 0.598 (0.512, 0.684) |
|                           | K-Complex Figure Tests            | Copy                                    | N/A                  | 0.653 (0.564, 0.743) |
|                           | K-Complex Figure Tests            | Immediate recall                        | N/A                  | 0.726 (0.640, 0.813) |
|                           | K-Complex Figure Tests            | Delayed recall                          | N/A                  | 0.714 (0.626, 0.801) |

|                         |                         |                                          |                      |                      |
|-------------------------|-------------------------|------------------------------------------|----------------------|----------------------|
| <b>Motor function</b>   | Grooved pegboard        | Dominant hand: Time to complete          | 0.670 (0.569, 0.771) | 0.781 (0.706, 0.856) |
|                         | Grooved pegboard        | Non-dominant hand: Time to complete      | 0.695 (0.591, 0.799) | N/A                  |
|                         | Finger tapping          | Dominant hand: Median number of taps     | 0.682 (0.577, 0.788) | N/A                  |
|                         | Finger tapping          | Non-dominant hand: Median number of taps | 0.601 (0.506, 0.697) | N/A                  |
| <b>Processing speed</b> | Trail Making Test-A     | Time to complete                         | 0.726 (0.627, 0.824) | 0.730 (0.649, 0.811) |
|                         | WAIS-III Digit Symbol   | Total correct symbols                    | 0.815 (0.724, 0.906) | 0.795 (0.731, 0.859) |
|                         | WAIS-III Symbol Search  | Total correct symbols                    | 0.743 (0.642, 0.843) | N/A                  |
|                         | Stroop colour-word test | Number of items completed                | 0.710 (0.638, 0.782) | N/A                  |

## References

1. Kamat R, McCutchan A, Kumarasamy N, Marcotte TD, Umlauf A, Selvamuthu P, et al. **Neurocognitive functioning among HIV-positive adults in southern India.** *Journal of neurovirology* 2017; 23(5):750-755.
2. Zhao T, Wei B, Long J, Tang X, Zhou M, Dang C. **Cognitive disorders in HIV-infected and AIDS patients in Guangxi, China.** *Journal of neurovirology* 2015; 21(1):32-42.
3. Krueger KR, Adeyemi O, Leurgans S, Shah RC, Jimenez AD, Ouellet L, et al. **Association of cognitive activity and neurocognitive function in blacks and whites with HIV.** *AIDS (London, England)* 2017; 31(3):437-441.
4. Do TC, Kerr SJ, Avihingsanon A, Suksawek S, Klungkang S, Channgam T, et al. **HIV-associated cognitive performance and psychomotor impairment in a Thai cohort on long-term cART.** *Journal of virus eradication* 2018; 4(1):41-47.
5. Kinai E, Komatsu K, Sakamoto M, Taniguchi T, Nakao A, Igari H, et al. **Association of age and time of disease with HIV-associated neurocognitive disorders: a Japanese nationwide multicenter study.** *Journal of neurovirology* 2017; 23(6):864-874.
6. Fitri FI, Rambe AS, Fitri A. **Correlation between Lymphocyte CD4 Count, Treatment Duration, Opportunistic Infection and Cognitive Function in Human Immunodeficiency Virus-Acquired Immunodeficiency Syndrome (HIV-AIDS) Patients.** *Open access Macedonian journal of medical sciences* 2018; 6(4):643-647.
